# Supplementary material for: Exploring the solid state properties of enzymatic poly(amine-co-ester) terpolymers to expand their applications in gene transfection
Source: Royal Society of Chemistry journal article supplement (doi:10.1039/c3ra46918b), 2014-01-01
Supplement: c3ra46918b.pdf [file c3ra46918b.pdf]

## Supplementary Section

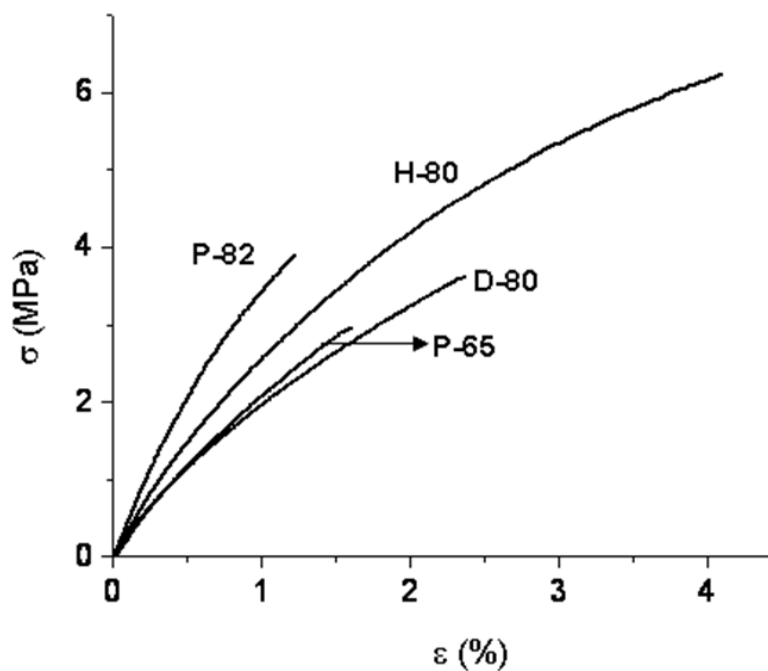

**Figure 1S.** Stress-strain curves of lactone-DES-MDEA terpolymers

**Table 1S.** Contact angle of water on lactone-DES-MDEA terpolymer films (after 30 seconds)

| Sample | Water contact angle (°) | Standard deviation |
|--------|-------------------------|--------------------|
| P-21   | 26.3                    | 1.6                |
| P-35   | 54.1                    | 0.3                |
| P-52   | 67.5                    | 0.2                |
| P-65   | 73.8                    | 0.5                |
| P-82   | 83.6                    | 1.0                |
| P-90   | 86.5                    | 1.0                |
| C-80   | 27.9                    | 0.5                |
| D-80   | 75.7                    | 1.1                |
| H-80   | 79.4                    | 1.1                |
